# Supplementary material for: Skeletal Muscle Consequences of Phosphatidylethanolamine Synthesis Deficiency
Source: PubMed Central journal article supplement — Function (Oxf). 2023 Apr 29;4(4):zqad020. doi: 10.1093/function/zqad020 (PMC10278983; doi:10.1093/function/zqad020), 2023-04-29

Supplementary Figure 1. H&E staining

*Pcyt2*<sup>+/+</sup>

*Pcyt2*<sup>+/-</sup>

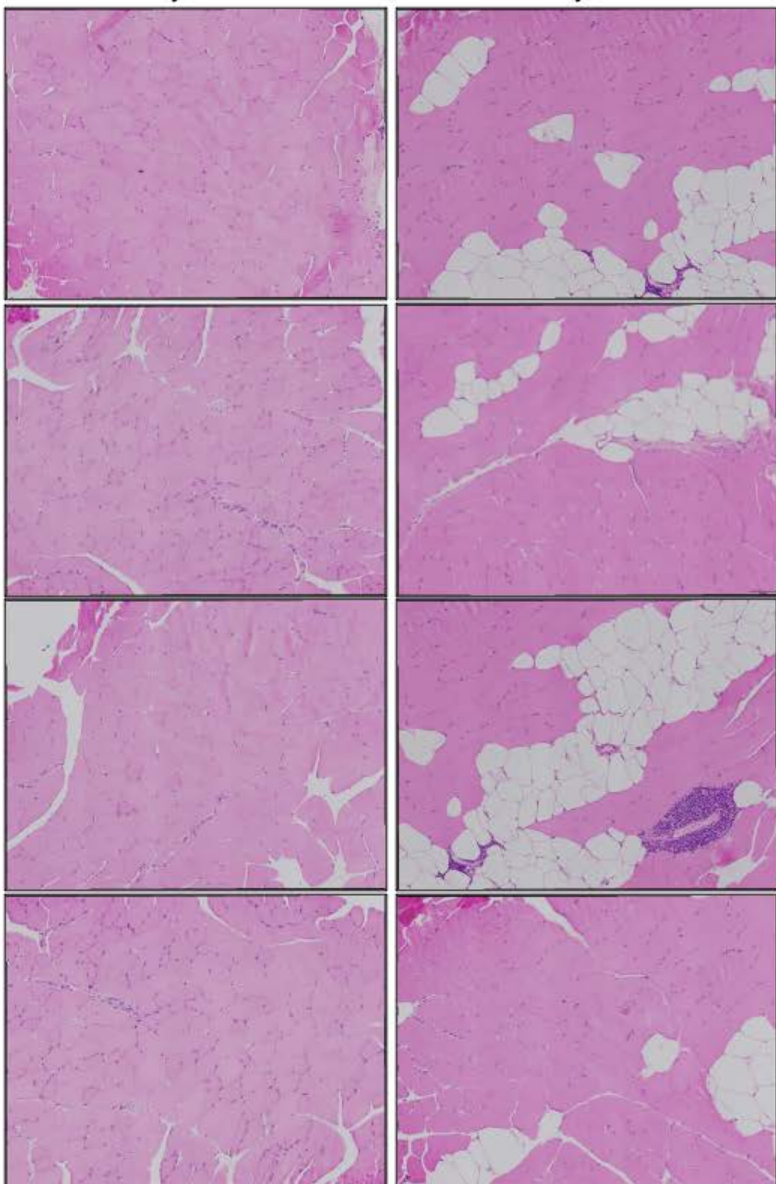

Supplementary Figure 2. TEM

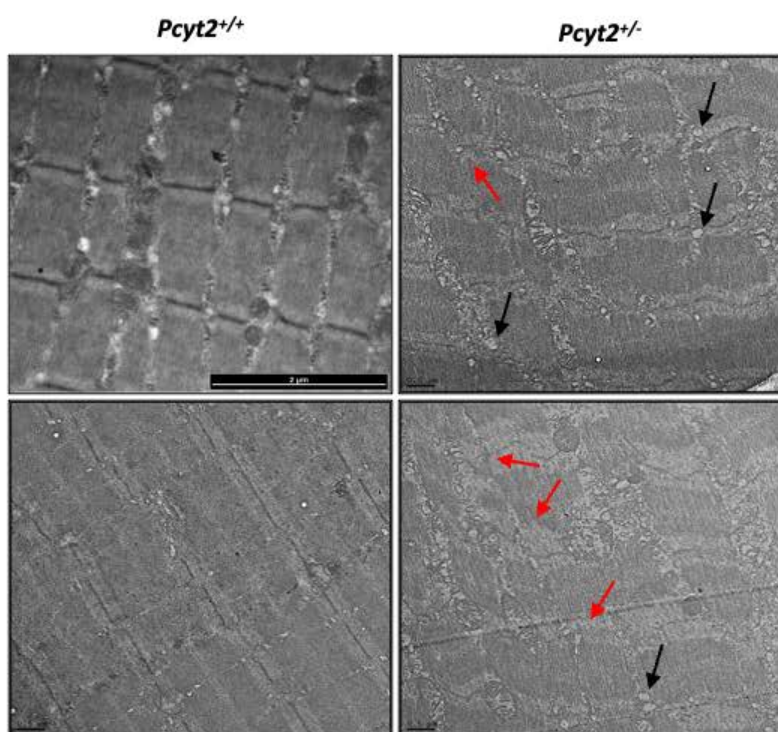

Supplementary Figure 3. CD3 staining

*Pcyt2*<sup>+/+</sup>

*Pcyt2*<sup>-/-</sup>

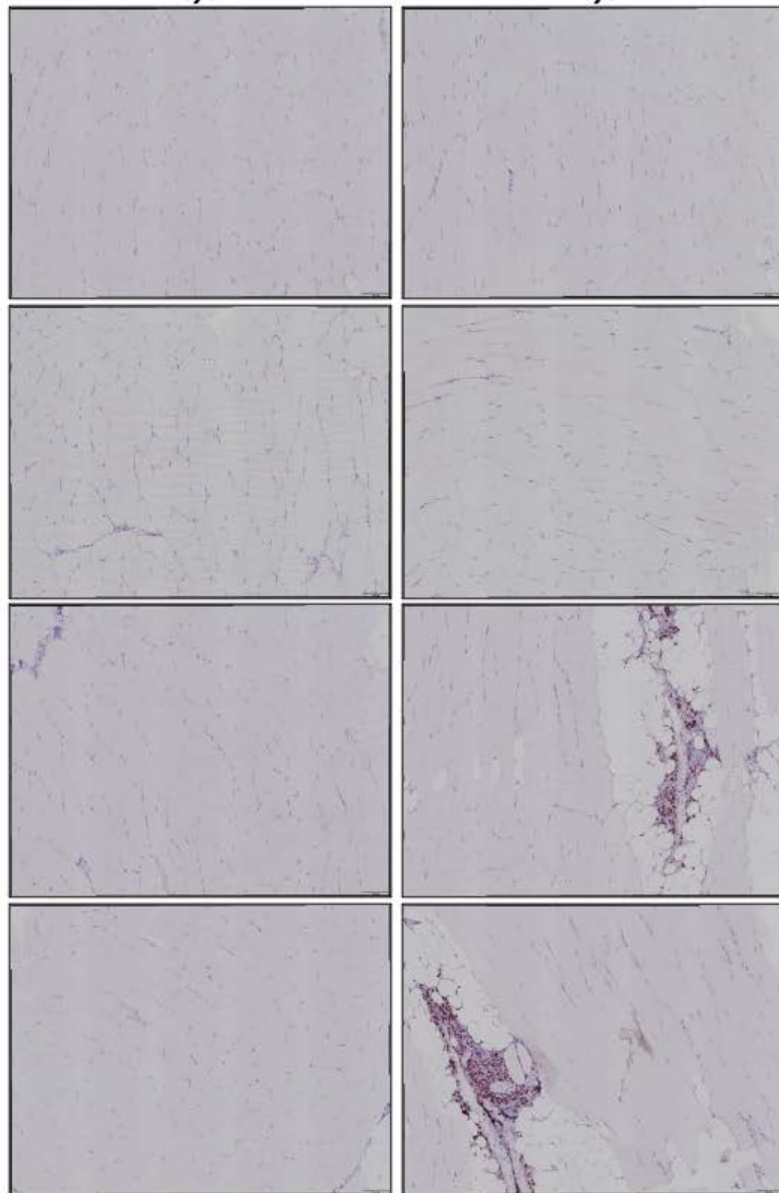

Supplementary Figure 4. F4/80 staining

*Pcyt2*<sup>+/+</sup>

*Pcyt2*<sup>-/-</sup>

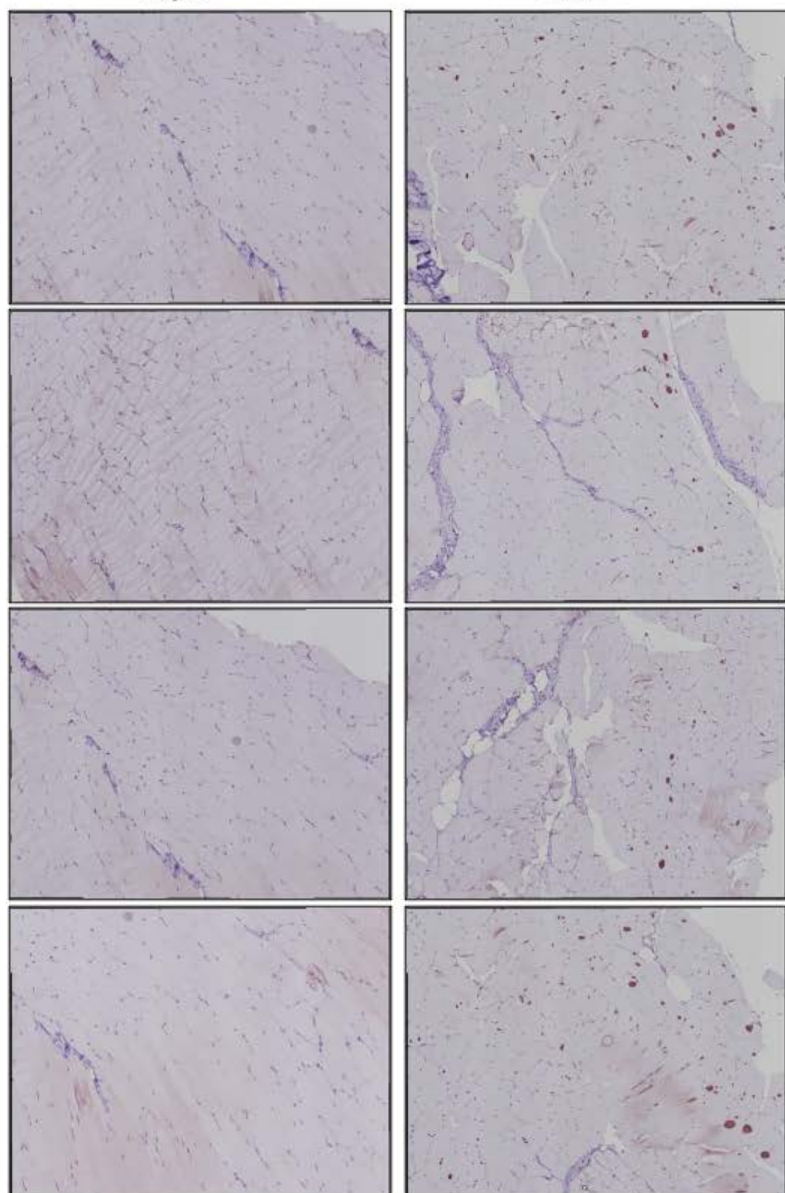

Supplementary Figure 5. Masson's Trichrome staining

*Pcyt2*<sup>+/+</sup>

*Pcyt2*<sup>+/-</sup>

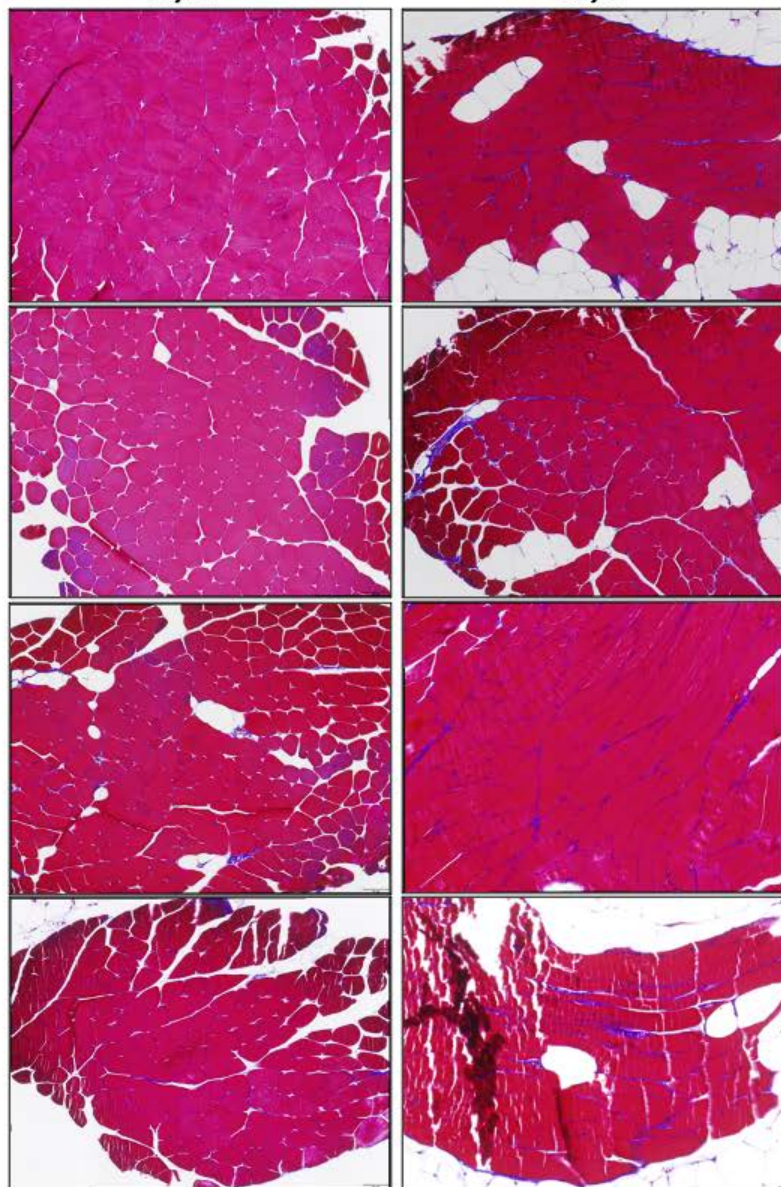

Supplement: zqad020_supplemental_file.pdf [file zqad020_supplemental_file.pdf]
